# Supplementary material for: Preparation of Ag nanoparticle-decorated poly(m-phenylenediamine) microparticles and their application for hydrogen peroxide detection
Source: Royal Society of Chemistry journal article supplement (doi:10.1039/c0an00929f), 2011-01-01
Supplement: c0an00929f.pdf [file c0an00929f.pdf]

## Electronic Supplementary Information

# Preparation of Ag Nanoparticle-Decorated Poly(m-phenylenediamine) Microparticles and Their Application for Hydrogen Peroxide Detection

Jingqi Tian,<sup>†,‡</sup> Hailong Li,<sup>†,‡</sup> Wenbo Lu,<sup>†</sup> Yonglan Luo,<sup>†</sup> Lei Wang,<sup>†</sup> and Xuping  
Sun<sup>†,\*</sup>

State Key Lab of Electroanalytical Chemistry, Changchun Institute of Applied  
Chemistry, Chinese Academy of Sciences, Graduate School of the Chinese Academy  
of Sciences, Changchun 130022, Jilin, P. R. China. Tel/Fax: 0086-431-85262065.

E-mail: sunxp@ciac.jl.cn

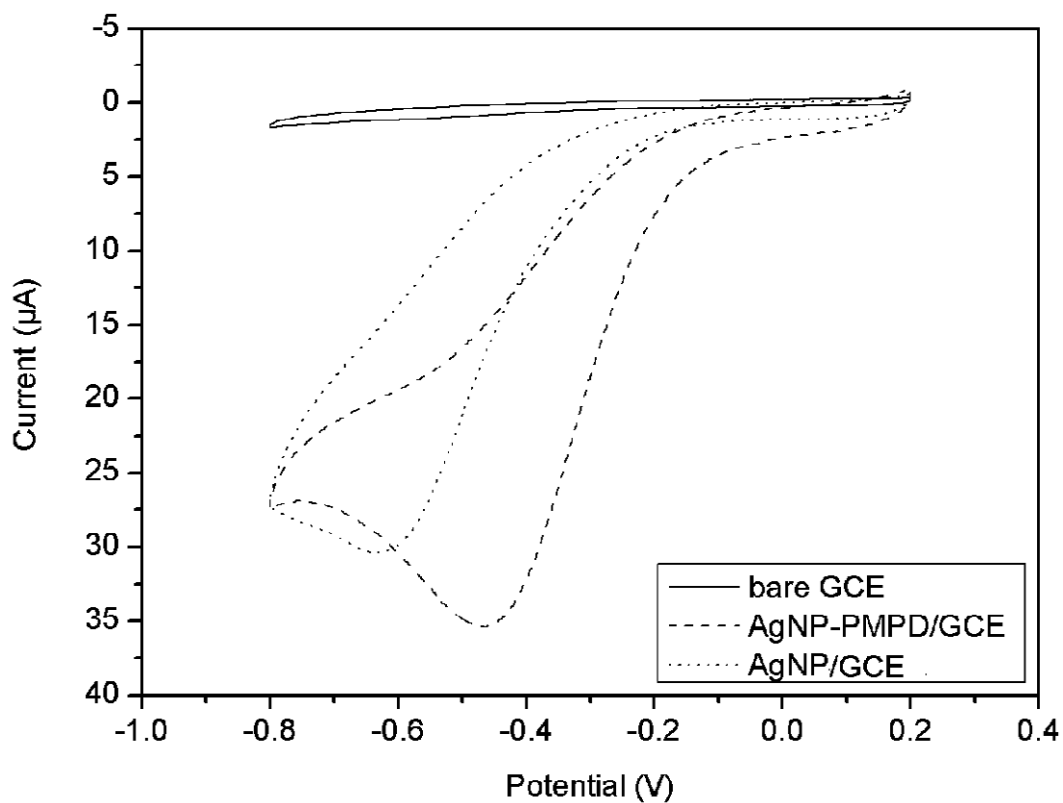

**Figure S1** Cyclic voltammeters (CV)s of bare GCE, AgNPs decorated PMPD microparticles modified GCE (AgNP-PMPD/GCE), and citrate-protected AgNP-modified GCE (AgNP/GCE) in 0.2 M PBS at pH 6.5 in the presence of 1.0 mM H<sub>2</sub>O<sub>2</sub> (scan rate: 0.02 V/s).

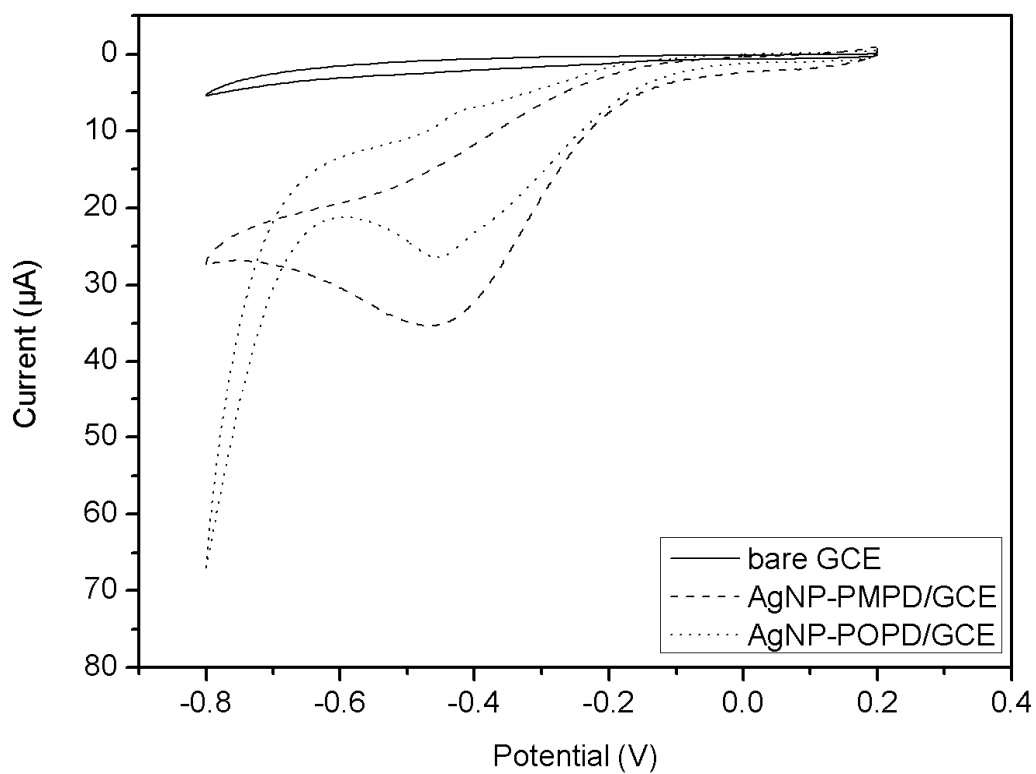

**Figure S2** CV results of a bare GCE, a AgNP-PMPD modified GCE(AgNP-PMPD/GCE) and a AgNP-POPd modified GCE(AgNP-POPd/GCE) in  $N_2$  saturated 0.2 M PBS at pH 6.5 in the presence of 1.0 mM  $H_2O_2$  (scan rate: 0.02 V/s).

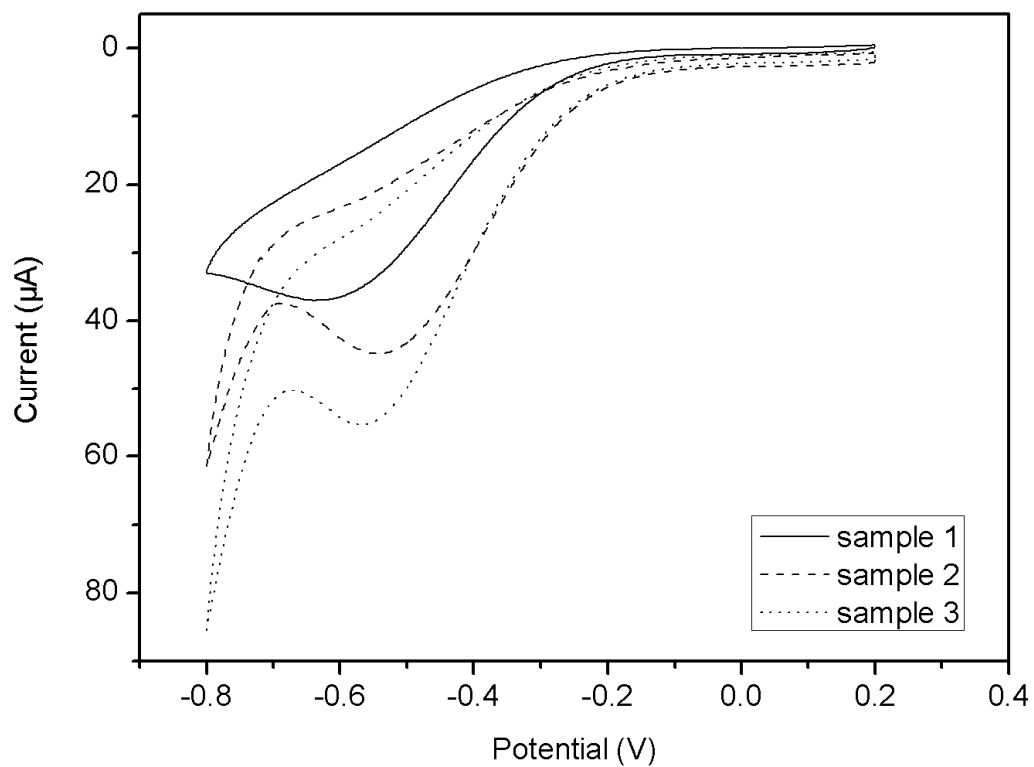

**Figure S3** CVs of the products modified GCE when the amount of  $\text{Ag}^+$  was up to 2-fold (sample 1), 4-fold (sample 2) and 8-fold (sample 3), respectively, in  $\text{N}_2$  saturated 0.2 M PBS at pH 6.5 in the presence of 1.0 mM  $\text{H}_2\text{O}_2$  (scan rate: 0.02 V/s)

**Table S1** A comparison of this work with literature work regarding the performance of the H<sub>2</sub>O<sub>2</sub> assay using Ag modified electrode.

| Type of electrode    | Performance    |                   | Ref.      |
|----------------------|----------------|-------------------|-----------|
|                      | LOD ( $\mu$ M) | Linear range (mM) |           |
| PEDOT/AgNPs/GCE      | 7              | -                 | 1         |
| AgNPS/PVA/Pt         | 1.0            | 0.04-6            | 2         |
| Ag microspheres/GCE  | 1.2            | 0.25-2            | 3         |
| AgNPs/collagen/GCE   | 0.7            | 0.005-40.6        | 4         |
| AgNPs/DNA/GCE        | 1.7            | 0.004-16          | 5         |
| AgNPs/GCE            | 2              | -                 | 6         |
| AgNPs/SBA-1S/GCE     | 12             | 0.049-970         | 7         |
| Roughed Ag electrode | 6              | 0.01-22.5         | 8         |
| AgNP-PMPD/GCE        | 4.7            | 0.1-30            | This work |

- 1 Balamurugan, A.; Chen, S. *Electroanalysis* **2009**, *21*, 1419.
- 2 Guascito, M. R.; Filippo, E.; Malitesta, C.; Manno, D.; Serra, A.; Turco, A. *Biosens. Bioelectron.* **2008**, *24*, 1057.
- 3 Zhao, B.; Liu, Z.; Liu, Z.; Liu, G.; Li, Z.; Wang, J.; Dong, X. *Electrochem. Commun.* **2009**, *11*, 1707.
- 4 Song, Y.; Cui, K.; Wang, L.; Chen, S. *Nanotechnology* **2009**, *20*, 105501.
- 5 Cui, K.; Song, Y.; Yao, Y.; Huang, Z.; Wang, L. *Electrochem. Commun.* **2008**, *10*, 663.
- 6 Welch, C. M.; Banks, C. E.; Simm, A. O.; Compton, R. G. *Anal. Bioanal. Chem.* **2005**, *382*, 12.
- 7 Lin, D.; Jiang, Y.; Wang, Y.; Sun, S. *J. Nanomater.* **2008**, *1*, 473791.
- 8 Lian, W.; Wang, L.; Song, Y.; Yuan, H.; Zhao, S.; Li, P.; Chen, L. *Electrochim. Acta* **2009**, *54*, 4334.
